# Supplementary figures and images for: Cancer-Associated Fibroblasts Affect Tumor Metabolism and Immune Microenvironment in Gastric Cancer and Identification of Its Characteristic Genes
Source: Hindawi journal article supplement (doi:10.1155/2023/1424589), 2023-01-30

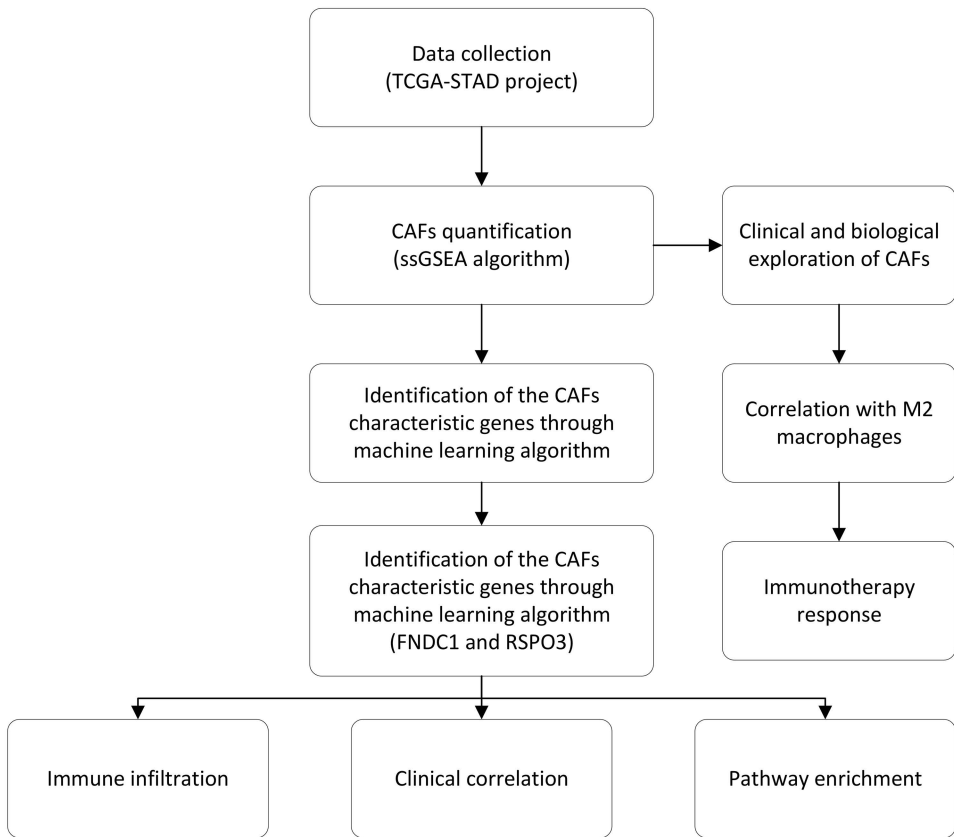

Supplement: f1 [file 1424589.f1.zip]

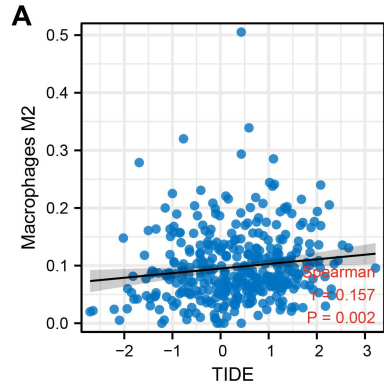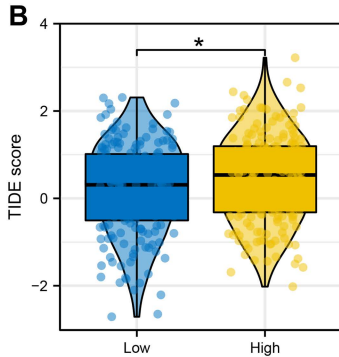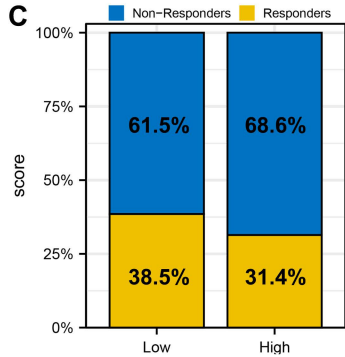

Supplement: f1 [file 1424589.f1.zip]

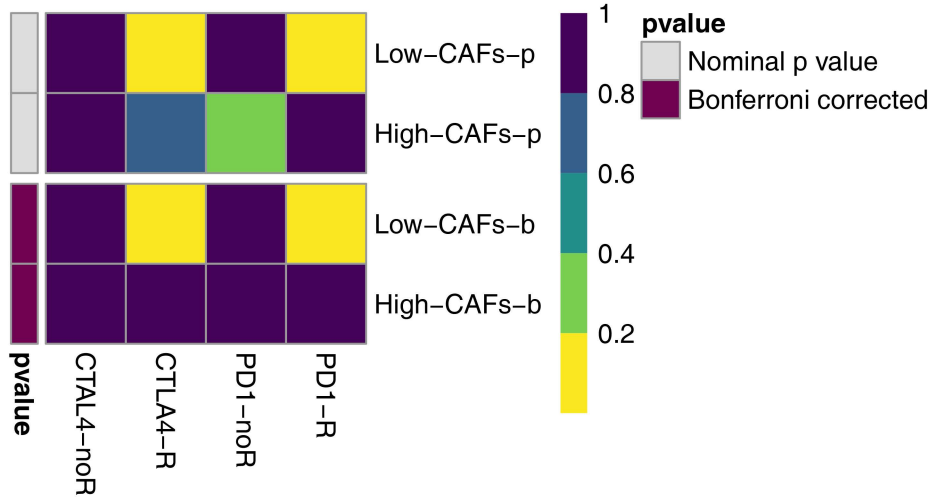

Supplement: f1 [file 1424589.f1.zip]

**A**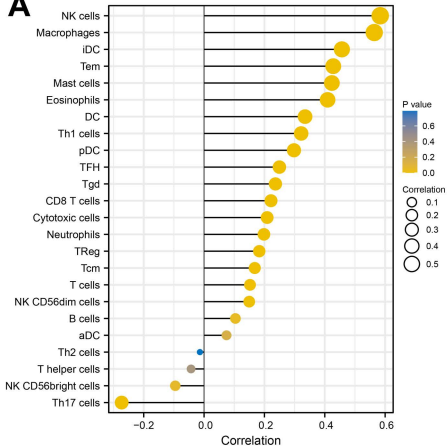**B**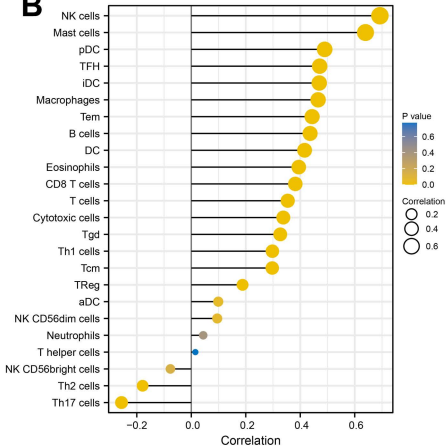

Supplement: f1 [file 1424589.f1.zip]
